# Supplementary material for: Endothelial Targeted Strategies to Combat Oxidative Stress: Improving Outcomes in Traumatic Brain Injury
Source: PubMed Central journal article supplement (PMC6593265; doi:10.3389/fneur.2019.00582), 2019-06-06
Supplement: Image_1.pdf [file Image_1.pdf]

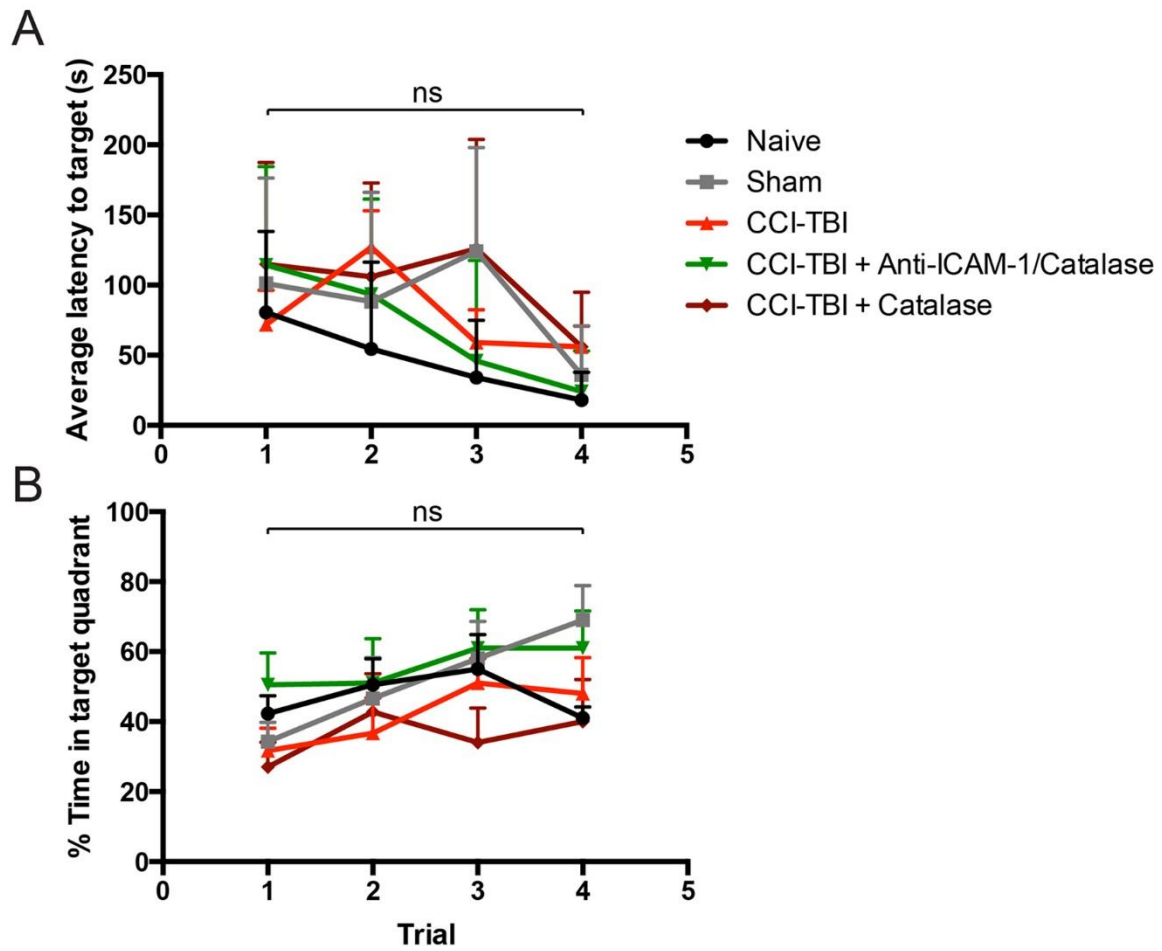

**Figure S1. Anti-ICAM-1/catalase trends toward improved cognitive function as evaluated by the Barnes maze.**
